# Supplementary material
Source: HighWire-hosted journal article supplement (https://www.cmajopen.ca/highwire/filestream/85272/field_highwire_adjunct_files/1/2020-0102-original-submission.pdf)
Supplement: 2020-0102-original-submission.pdf [file 2020-0102-original-submission.pdf]

1  
2  
3 **What family doctors actually want in a job: a cross-sectional survey of**  
4 **primary care reform priorities**

5  
6 Lindsay Hedden, PhD<sup>1,2</sup>, Setareh Banihosseini<sup>4</sup>, MD, PhD, Nardia Strydom<sup>3,4,5</sup>, Rita  
7 McCracken<sup>3,4</sup>, MD, PhD

8 <sup>1</sup>Faculty of Health Sciences  
9 Simon Fraser University

10  
11 <sup>2</sup> Academic Health Science Network

12  
13 <sup>3</sup>Department of Family Medicine  
14 Faculty of Medicine  
15 University of British Columbia

16  
17 <sup>4</sup>Department of Family Medicine  
18 Providence Health Care

19  
20 <sup>5</sup>Department of Family Medicine  
21 Vancouver Coastal Health Authority

22  
23 Lindsay Hedden – [Lindsay\\_hedden@sfu.ca](mailto:Lindsay_hedden@sfu.ca)  
24 Rita McCracken – [rita.mccracken@ubc.ca](mailto:rita.mccracken@ubc.ca)  
25 Setareh Banihosseini - [sbanhosseini@providencehealth.bc.ca](mailto:sbanhosseini@providencehealth.bc.ca)  
26 Nardia Strydom - [Nstrydom@providencehealth.bc.ca](mailto:Nstrydom@providencehealth.bc.ca)  
27  
28

29 **\*Address Correspondence (and Request for Reprints) to:**

30  
31 Dr. Rita McCracken  
32 [Rita.mccracken@ubc.ca](mailto:Rita.mccracken@ubc.ca)  
33

34 **Number of Tables: 4**  
35 **Word: 2485**  
36  
37  
38  
39  
40  
41  
42  
43  
44  
45  
46  
47  
48  
49  
50  
51  
52  
53  
54  
55  
56  
57  
58  
59  
60

## Abstract

**Background:** Despite consistent increases in primary care physicians per-capita, BC is facing a family physician (FP) shortage. System-level reform to address the shortage is ongoing. We sought to explore FPs' perspectives about priorities reforms, and discuss alignment of those perspectives with the provincial policy direction.

**Methods:** All FPs credentialed within Vancouver Coast Health (VCH) Authority in 2018 were invited to participate in a cross-sectional survey (N=1017). Respondents were asked about their current model of practice and other practice characteristics, demographics, level of burnout, and priorities for system-level reform. We used chi-square tests and multivariable logistic regression to investigate relationships between personal and practice characteristics, burnout, and priorities for reform.

**Results:** We received responses from 541 (53.2%) FPs. 399 (73.8%) respondents indicated a need for fundamental change to how primary care is delivered. 244 (47.6%) reported they would prefer to be an employee of a clinic, rather than a small business owner. Other identified reform priorities included options to practice in a team (reported as very important by 64.7% of respondents), direct funding for team roles (66.7%), direct clinic funding (59.8%), part-time work options (69.6%) and parental leave (81.1%). Priorities for reform were consistent across practice models.

**Interpretation:** Half of FPs would prefer to be employees of a clinic rather than small business owners, a model that has very limited availability in the province. The lack of availability of this model may push physicians away from community-based family medicine and towards alternative models, contributing to ongoing access issues for patients.

**Keywords:** Primary health care; family medicine; reform; workforce planning; models of practice

## 1. Introduction

The British Columbia (BC) Ministry of Health is implementing a suite of structural reforms to primary care (1–3) to address the worsening family physician (FP) shortage and introduce an integrated system of primary and community care. The reforms are centered around interdisciplinary teams working within Patient Medical Homes (4), that are collectively organized into Primary Care Networks (5). Under these reforms, practices will remain FP owned and operated, and fee-for-service remuneration will continue to be the primary payment scheme. There is a need to assess whether these reforms are concordant with physician perspectives on what specific strategies are needed to improve access to primary care. This study takes initial steps to address that knowledge gap.

Job satisfaction among FPs is generally high (6–9); however, rates of stress and burnout are also high (10–13), and concerns about poor work-life balance (14–16), burden of administrative work (14,17), long hours (6,7,14,16,18,19), and rate of pay (6–8,14,17,20) are frequently raised. Despite a lack of supported structural change to date, FPs in BC appear to be moving towards alternative or blended models of practice, such as working part-time in hospitals, long-term care, clinically-focused practice, or in walk-in clinics (21–24). The reasons for this shift have not yet been directly examined; however, it's fair to hypothesize that FPs are seeking practice arrangements that will reduce administrative burden, lower stress, reduce burnout, and/or improve work-life balance. This has the net effect of reducing the capacity for longitudinal, community-based family medicine, potentially contributing to ongoing access challenges (25).

1  
2  
3 Given this ongoing shift away from family medicine and widespread access challenges, it is  
4 essential that Ministry reforms are in alignment with both current evidence on best practices in  
5 primary care and on physician preferences. Assessing this alignment could facilitate creation of  
6 a pragmatic policy shift to address the FP shortage. The objective of this study is therefore to  
7 identify new to practice and established PFs' specific priorities for structural health system  
8 reform and provide commentary on the alignment of those priorities with BC's slated suite of  
9 incoming primary care reforms.  
10  
11  
12  
13  
14  
15  
16  
17  
18  
19  
20

## 21 **2. Methods**

### 22 **2.1 Setting and Data Collection**

23  
24 Primary care in BC consists primarily of physicians working in solo or small-group practice  
25 community clinics under a fee-for-service (FFS) remuneration model. While some other  
26 Canadian provinces have moved away from this model, incorporating team-based care, non-  
27 physician health professionals and alternative forms of remuneration (26,27), there has been little  
28 structural change to primary care organization and delivery in BC.  
29  
30  
31  
32  
33  
34  
35  
36  
37  
38  
39

40 This study was conducted within Vancouver Coastal Health (VCH) Authority, one of five  
41 regional health authorities in BC, which provides services to approximately one quarter of the  
42 province's population. Data used in this study were drawn from an annual credentialing survey  
43 of physicians seeking to maintain privileges to provide services at VCH facilities. The voluntary  
44 survey was designed to capture information on physician practice models and patterns and  
45 demographics in order to inform workforce planning for the Health Authority. Questions about  
46 priorities for structural reform to the primary health care system in BC were also included. All  
47  
48  
49  
50  
51  
52  
53  
54  
55  
56  
57  
58  
59  
60

1  
2  
3 family physicians who had clinical privileges within VCH were sent a participation request and  
4 reminders (at one and five weeks) via email. The survey was administered online through  
5 REDCap, and the research team used de-identified data for analysis. Data were collected  
6  
7  
8 between January 30<sup>th</sup> and April 15<sup>th</sup> of 2018.  
9  
10  
11  
12  
13

## 14 **2.2 Variables**

15  
16  
17 Participants were asked whether they felt that any changes needed to be made to how primary  
18 care is being delivered in BC. They were also asked about their preferences for a non-fee-for-  
19 service remuneration model (such as capitation or salary) and whether or not they would prefer  
20 to be an employee of a clinic rather than a small business owner. In addition, participants were  
21 asked to consider what it would take for them to provide longitudinal, community-based care to  
22 more people by rating a series of specific potential reform priorities. These priorities covered  
23 payment structure, work structure and job benefits, and response options were “not important”,  
24 “somewhat important”, or “very important”. The specific reform priority options were selected  
25 based on the content of the Ministry of Health’s policy direction for primary and community care  
26 (28) as well as based on an existing survey of practice preferences for newly practicing FPs in  
27 BC (29).  
28  
29  
30  
31  
32  
33  
34  
35  
36  
37  
38  
39  
40  
41  
42  
43

44 We assessed level of burnout using a validated single-item measure: “I feel burned out from my  
45 work” (30,31). Responses are measured on a seven-point scale that ranges from “never” to  
46 “every day”. West and colleagues define a cut-point of four (feeling burnt out once per week or  
47 more) as “high levels of burnout” (30).  
48  
49  
50  
51  
52  
53  
54  
55  
56  
57  
58  
59  
60

1  
2  
3 Our two key independent variables of interest were newness to practice, and model of practice.  
4  
5 We identified new to practice physicians as those who completed medical school within the last  
6  
7 twelve years (i.e. had a maximum ten years in practice after residency), and established  
8  
9 physicians as those who graduated more than twelve years ago. Models of practice included full-  
10  
11 time community-based primary care (CBPC) (>37.5 hours per week), mostly CBPC plus other  
12  
13 work (20-<37.5 hours per week CBPC), mostly other work but some CPSC (<20 hours per week  
14  
15 CBPC), full-time hospital or inpatient care only, or locum only. Demographic data included  
16  
17 gender, number of years in practice, location of training (within or outside of Canada), and  
18  
19 location of practice (rural or urban). We also collected data on work hours and on-call  
20  
21 responsibilities.  
22  
23  
24  
25  
26  
27  
28

### 29 **2.3 Statistical Analyses**

30  
31 We dichotomized responses to the reform priority questions by grouping “somewhat important”,  
32  
33 “not important” and “no opinion”. We conducted sensitivity analysis by grouping “somewhat”  
34  
35 and “very important”, compared to “not important” and “no opinion” to determine if this  
36  
37 alternative resulted in similar patterns by practice model and newness to practice. The decision to  
38  
39 dichotomize was made for ease interpretation of multivariable model results. We compared new  
40  
41 to practice physicians to established ones according to model of practice, demographic  
42  
43 characteristics, burnout, and reform priorities at the bivariate level using Chi Square tests.  
44  
45  
46  
47  
48  
49

50 We used multivariable logistic regression to examine the independent relationships between  
51  
52 dichotomous burnout and reform priority measures with our two key independent variables of  
53  
54 interest: newness to practice, and model of practice. In all cases we adjusted for the potentially  
55  
56  
57  
58  
59  
60

1  
2  
3 confounding effect of gender, training location, practice location and weekly work hours. We  
4 report results as odd ratios and 95% confidence intervals. Individuals with missing values for  
5  
6 specific outcome variables were excluded from those models.  
7  
8  
9

### 10 11 12 **3. Results**

#### 13 14 15 **3.1 Descriptive Results**

16  
17 One thousand and seventeen FPs seeking a renewal of privileges were invited to complete the  
18 survey. Among them, 525 (51.6%) responded and completed the core model of practice and  
19 demographic questions. The sample included 291 (55.5%) women, 112 (21.1%) international  
20 medical graduates and 111 (21.1%) physicians who do at least some of their work in a rural area  
21 (Table 1). At the bivariate level, new to practice physicians differed from established physicians  
22 on all variables with the exception of the provision of call coverage. New physicians worked  
23 more hours on average (47.3 versus 42.9 hours per week for established physicians), had lower  
24 odds of reporting that they worked entirely in CBPC (15.9% versus 24.1%), and higher odds of  
25 being a locum (22.7 versus 9.5%,  $p < 0.0001$ ).  
26  
27  
28  
29  
30  
31  
32  
33  
34  
35  
36  
37  
38  
39

40 Two hundred twenty-three (42.5%) individuals reported experiencing a high level of burnout  
41 (Table 2). Rates of burnout varied significantly by years in practice, with new to practice  
42 physicians having higher odds compared to more established ones (51.7% versus 37.8%).  
43  
44  
45  
46  
47  
48

49 The majority of the sample (77.8%) reported that primary care reform is needed in BC. Almost  
50 half (47.5%) reported that they would prefer to be an employee of a clinic rather than a small  
51 business owner. Highest levels of support were reported for vacation and parental leave  
52  
53  
54  
55  
56  
57  
58  
59  
60

1  
2  
3 (81.1%), option to work part-time (69.6%), option to practice in a team (64.7%) and direct  
4  
5 funding for team-roles (66.7%). New to practice physicians had higher odds of reporting all  
6  
7 priorities as being very important compared to established physicians, with the exception of  
8  
9 vacation and parental leave, transparent evaluation of transformation initiatives, and option to  
10  
11 practice in a team.  
12  
13  
14  
15  
16

### 17 **3.2 Burnout**

18  
19  
20 The relationship between newness to practice and burnout did not persist when we adjusted for  
21  
22 demographic and practice variables (Table 3). Rather, women (OR 1.94, 95% CI 1.32-2.85) and  
23  
24 individuals who work more than forty hours per week (e.g. 60+ hours per week OR 4.26, 95%CI  
25  
26 2.02-8.98) had higher odds of experiencing high levels of burnout. No other variables had a  
27  
28 statistically significant association with rate of burnout in the multivariable model.  
29  
30  
31  
32  
33

### 34 **3.3 Reform Priorities**

35  
36  
37 New to practice physicians had higher odds of reporting that all reform priorities (with the  
38  
39 exception of transparent evaluation of reform initiatives, and vacation and parental leave) were  
40  
41 very important, consistent with the bivariate level analyses (Table 4 a and b)). They also had  
42  
43 higher odds of reporting they felt a non-fee for service remuneration model would make it easier  
44  
45 to provide longitudinal care (OR 3.45, 95% CI 2.22-5.38) and that they'd prefer to work as  
46  
47 employee of a clinic rather than a small business owner (OR 2.29, 95% CI 1.48-3.49).  
48  
49  
50  
51  
52

53 Individuals working in blended models of practice (either mostly CBPC or mostly  
54  
55 hospital/facility) also had higher odds of preferring non fee-for-service remuneration and direct  
56  
57  
58  
59  
60

1  
2  
3 employment rather than an entrepreneurial model. Model of practice also seemed to be related to  
4  
5 some specific priorities, with physicians working in blended or hospital-based roles having  
6  
7 higher odds of reporting that team-based care, direct funding for team roles, and time-limited  
8  
9 commitments to a patient panel were very important.  
10  
11  
12  
13

14  
15 Physicians in rural practice had lower odds of agreeing that primary care reform is needed (OR  
16  
17 0.57, 95% CI 0.35-0.94). Physicians who trained outside of Canada had higher odds of reporting  
18  
19 that options to practice as a team (OR 1.68, 95% CI 1.01-2.82), direct funding for team roles (OR  
20  
21 1.69, 95% CI 1.02-2.79), and a time-limited commitment to a patient panel (OR 2.48, 95%CI  
22  
23 1.48-4.14) were very important. Weekly work hours did not appear to be predictive of reform  
24  
25 priority preferences with the exception of the option to work part time and loan forgiveness, with  
26  
27 physicians working the most hours having lower odds of reporting that part time options were  
28  
29 very important (e.g. OR for >60 hours/week 0.32, 95% CI 0.15-0.69), and higher odds that loan  
30  
31 forgiveness was very important (OR 3.44, 95% CI 1.49-7.91).  
32  
33  
34  
35  
36  
37

### 38 **3.4 Sensitivity Analysis**

39  
40  
41 We conducted sensitivity analysis to examine the robustness of our analytic choices. Grouping  
42  
43 reform priority “somewhat important” and “very important” responses to questions about  
44  
45 individual reform priorities resulted in only very minor changes to the odds ratios we report in  
46  
47 tables 5 a and b, and no changes in directionality.  
48  
49  
50  
51

## 52 **4. Discussion**

1  
2  
3 Almost 80% of the physicians we surveyed agreed that BC's primary care system is in need of  
4 fundamental reform, and 42% met the criteria for suffering a high level of burnout within their  
5 current model of practice. We found a high rate of agreement among all physicians for the  
6 majority of different possible priorities, and with the exception of vacation and parental leave,  
7 and evaluation of reforms, where level of agreement was higher among newer to practice  
8 physicians.  
9

10  
11  
12  
13  
14  
15  
16  
17  
18  
19 Direct employment, rather than being a small business owner was preferred by almost half of  
20 respondents. Direct clinic funding and benefits (vacation and parental leave), both of which  
21 could be included in a direct employment model, also had high levels of support. These finding  
22 are consistent with the American literature on the declining rate of small business ownership  
23 among physicians, particularly among newer to practice physicians and women (32). Previous  
24 studies of physicians' overall satisfaction with work-life suggests that they are more likely to  
25 experience burnout when they spend more time doing work they perceive as being less  
26 meaningful, such as administrative and management tasks (33). Furthermore, compared to  
27 physician ownership, models of practice in which clinics are owned by hospitals (and physicians  
28 are therefore employees) have been associated with lower rates of burnout and more positive  
29 perceptions of work environment (34). It follows that models of practice that involve more  
30 administrative burden, such as BC's standard physician owned-and-operated FFS practices, may  
31 be associated with higher rates of burnout and lower satisfaction.  
32  
33  
34  
35  
36  
37  
38  
39  
40  
41  
42  
43  
44  
45  
46  
47  
48  
49  
50

51 The proportion of physicians who would prefer to be an employee rather than small business  
52 owner is particularly striking because it represents a radical departure from BC's "classic" model  
53  
54  
55  
56  
57  
58  
59  
60

1  
2  
3 of entrepreneurial practice, and because it is a model that not being supported within the Ministry  
4  
5 of Health's suite of reforms.  
6  
7  
8  
9

10 Interdisciplinary team-based care and direct funding for team roles also had a high degree of  
11 support. The Ministry's Integrated System of Primary and Community care introduces  
12 opportunities for team-based care in a Patient Medical Home model, and as well as in networks,  
13 and funding is provided to support these expanded roles. This new policy also introduces an  
14 alternative payment contract specifically for new-to-practice physicians who do not wish to be  
15 paid under the standard FFS model. On the surface, this aligns with our findings that family  
16 physicians are looking for an alternative model. However, the BC Society of General  
17 Practitioners advised their membership not to accept the contracts, stating that they were  
18 developed without sufficient physician consultation and that they do not reflect the needs of  
19 patients or physicians, undervaluing community-based family doctors relative to those  
20 practicing in hospitals or urgent care centres (35).  
21  
22  
23  
24  
25  
26  
27  
28  
29  
30  
31  
32  
33  
34  
35  
36  
37

#### 38 **4.1 Limitations**

39  
40 This research was conducted as a cross-sectional survey of physicians working in a large, urban  
41 health authority in BC. While our survey had a high response rate relative to other similar  
42 surveys (36), it is important to note that the perspectives of our respondents may be different  
43 from physicians who elected not to participate or who were not eligible (i.e. who did not have  
44 privileges in a VCH facility). Furthermore, physicians working within VCH may structure their  
45 practices in ways that are fundamentally different from those working in regional health  
46  
47  
48  
49  
50  
51  
52  
53  
54  
55  
56  
57  
58  
59  
60

1  
2  
3 authorities with more rural and remote areas. Consequently their priorities for reform may be  
4  
5 different from what we report.  
6  
7  
8  
9

10 While we based our selection of reform priorities on existing literature and on relevance to the  
11  
12 local context (given incoming structural reforms), the list was certainly not exhaustive. It is  
13  
14 possible that other structural reform options that were not listed may be highly desirable.  
15

16  
17 Additional qualitative work should explore whether there are additional evidence-informed  
18  
19 reforms that would encourage more physicians to work in community-based family medicine.  
20  
21  
22

## 23 24 **4.2 Conclusions**

25  
26 There is general agreement that BC's primary care system is in need of fundamental reform.  
27

28 While the approach taken by the Ministry of Health does address some physician priorities (the  
29  
30 ability to practice in interdisciplinary teams in particular), there are certainly gaps. The lack of  
31  
32 availability of a model in which physicians are employees rather than business owners is a  
33  
34 striking oversight, and one that may continue to push many physicians away from longitudinal,  
35  
36 community-based primary care, and into other models or specialities, exacerbating significant  
37  
38 accessibility challenges for patients.  
39  
40  
41  
42  
43  
44

## 45 **Authors' contributions**

46  
47 LH developed the online survey tool, designed the analytic strategy, cleaned and analyzed all  
48  
49 data, drafted the manuscript and incorporated coauthor feedback. RM conceptualized the study,  
50  
51 drafted the survey questions, and provided feedback on data analyses and manuscript  
52  
53 development at all stages. SB assisted with conceptualization of the study, and contributed to  
54  
55  
56  
57  
58  
59  
60

1  
2  
3 drafting the manuscript. NS assisted with conceptualizing the study, contributed to drafting the  
4 manuscript and interpretation of results. All authors read and approved the final manuscript.  
5  
6  
7  
8  
9

### 10 **Acknowledgements**

11  
12 The authors wish to gratefully acknowledge the contributions of Kassra Hassani, Sara  
13 Zeinoddini, Ali Mokhtari Amirmajdi, Xi Kang, Parisa Khoshpouri, and Javad Ramezani on the  
14 Models and Access Atlas of Primary Care (MAAP) – BC Study.  
15  
16  
17  
18  
19  
20  
21  
22  
23  
24  
25  
26  
27  
28  
29  
30  
31  
32  
33  
34  
35  
36  
37  
38  
39  
40  
41  
42  
43  
44  
45  
46  
47  
48  
49  
50  
51  
52  
53  
54  
55  
56  
57  
58  
59  
60

Confidential

## References

1. British Columbia Ministry of Health. General Policy Direction - Primary Care Networks. British Columbia Ministry of Health; 2017.
2. British Columbia Ministry of Health. Supportive Policy Direction - Interdisciplinary Team Based Care. British Columbia Ministry of Health; 2017.
3. British Columbia Ministry of Health. Supportive Policy Direction - Patient Medical Homes. British Columbia Ministry of Health; 2017.
4. Hefford B. The patient medical home: Working together to create an integrated system of care. *British Columbia Medical Journal*. 2017 Jan;59(1):15–7.
5. Godwin A, Moradi A. The value of data: Identifying patient and community needs to inform primary care networks. *British Columbia Medical Journal*. 2019 Jul;61(6):261–2.
6. Goetz K, Campbell SM, Steinhäuser J, Broge B, Willms S, Szecsenyi J. Evaluation of job satisfaction of practice staff and general practitioners: an exploratory study. *BMC Family Practice*. 2011 Dec 12;12(1):137.
7. Leigh JP, Kravitz RL, Schembri M, Samuels SJ, Mobley S. Physician career satisfaction across specialties. *Arch Intern Med*. 2002 Jul 22;162(14):1577–84.
8. Leigh JP, Tancredi DJ, Kravitz RL. Physician career satisfaction within specialties. *BMC Health Serv Res*. 2009 Sep 16;9:166.
9. Canadian Medical Association. CMA National Physician Health Survey: A National Snapshot [Internet]. 2018 Nov [cited 2020 Jan 13]. Available from: <https://www.cma.ca/sites/default/files/2018-11/nph-survey-e.pdf>
10. Rabatin J, Williams E, Baier Manwell L, Schwartz MD, Brown RL, Linzer M. Predictors and Outcomes of Burnout in Primary Care Physicians. *J Prim Care Community Health*. 2016 Jan;7(1):41–3.
11. Puffer JC, Knight HC, O’Neill TR, Rassolian M, Bazemore AW, Peterson LE, et al. Prevalence of Burnout in Board Certified Family Physicians. *J Am Board Fam Med*. 2017 Mar;30(2):125–6.
12. Lee FJ, Stewart M, Brown JB. Stress, burnout, and strategies for reducing them: what’s the situation among Canadian family physicians? *Can Fam Physician*. 2008 Feb;54(2):234–5.
13. Thommasen HV, Lavanchy M, Connelly I, Berkowitz J, Grzybowski S. Mental health, job satisfaction, and intention to relocate. Opinions of physicians in rural British Columbia. *Canadian Family Physician*. 2001 Apr 1;47(4):737–44.
14. Behmann M, Schmiemann\* G, Lingner H, Kühne F, Hummers-Pradier E, Schneider N. Job Satisfaction Among Primary Care Physicians. *Dtsch Arztebl Int*. 2012 Mar;109(11):193–200.

15. Duffy RD, Richard GV. Physician Job Satisfaction across Six Major Specialties. *Journal of Vocational Behavior*. 2006 Jun;68(3):548–59.
16. Incitti F, Rourke J, Rourke LL, Kennard M. Rural women family physicians. Are they unique? *Can Fam Physician*. 2003 Mar;49:320–7.
17. Deshpande SP, DeMello J. An Empirical Investigation of Factors Influencing Career Satisfaction of Primary Care Physicians. *J Am Board Fam Med*. 2010 Nov 1;23(6):762–9.
18. Ham IV, Verhoeven AAH, Groenier KH, Groothoff JW, Haan JD. Job satisfaction among general practitioners: A systematic literature review. *European Journal of General Practice*. 2006 Jan 1;12(4):174–80.
19. Keeton K, Fenner DE, Johnson TRB, Hayward RA. Predictors of physician career satisfaction, work-life balance, and burnout. *Obstet Gynecol*. 2007 Apr;109(4):949–55.
20. Friedberg MW, Chen PG, Van Busum KR, Aunon F, Pham C, Caloyeras J, et al. Factors Affecting Physician Professional Satisfaction and Their Implications for Patient Care, Health Systems, and Health Policy. *Rand Health Q [Internet]*. 2014 Dec 1 [cited 2020 Jan 17];3(4). Available from: <https://www.ncbi.nlm.nih.gov/pmc/articles/PMC5051918/>
21. Soong C, Fan E, Howell EE, Maloney RJ, Pronovost PJ, Wilton D, et al. Characteristics of Hospitalists and Hospitalist Programs in the United States and Canada. *Journal of Clinical Outcomes Management*. 2009 Feb 1;16:69–74.
22. White HL, Stukel TA, Wodchis WP, Glazier RH. Defining hospitalist physicians using clinical practice data: a systems-level pilot study of Ontario physicians. *Open Med*. 2013 Sep 17;7(3):e74–84.
23. Wachter RM, Bell D. Renaissance of hospital generalists. *BMJ*. 2012 Feb 13;344(feb13 1):e652–e652.
24. Pong R. Post-M.D. Training in Family Medicine in Canada: Continuity and Change over a 15 Year Period. *Canadian Post-M.D. Education Registry*; 2012.
25. Hedden L, Barer ML, McGrail K, Law M, Bourgeault IL. In British Columbia, The Supply Of Primary Care Physicians Grew, But Their Rate Of Clinical Activity Declined. *Health Affairs*. 2017 Nov;36(11):1904–11.
26. Peckham A, Ho J, Marchildon G. Policy innovations in primary care across Canada [Internet]. *North American Observatory on Health Systems and Policies*; 2018 Mar [cited 2020 Jan 13] p. 63. Available from: [https://ihpme.utoronto.ca/wp-content/uploads/2018/04/NAO-Rapid-Review-1\\_EN.pdf](https://ihpme.utoronto.ca/wp-content/uploads/2018/04/NAO-Rapid-Review-1_EN.pdf)
27. Hutchison B, Levesque J-F, Strumpf E, Coyle N. Primary Health Care in Canada: Systems in Motion: Primary Health Care in Canada: Systems in Motion. *Milbank Quarterly*. 2011 Jun;89(2):256–88.

- 1
  - 2
  - 3
  - 4
  - 5
  - 6
  - 7
  - 8
  - 9
  - 10
  - 11
  - 12
  - 13
  - 14
  - 15
  - 16
  - 17
  - 18
  - 19
  - 20
  - 21
  - 22
  - 23
  - 24
  - 25
  - 26
  - 27
  - 28
  - 29
  - 30
  - 31
  - 32
  - 33
  - 34
  - 35
  - 36
  - 37
  - 38
  - 39
  - 40
  - 41
  - 42
  - 43
  - 44
  - 45
  - 46
  - 47
  - 48
  - 49
  - 50
  - 51
  - 52
  - 53
  - 54
  - 55
  - 56
  - 57
  - 58
  - 59
  - 60
28. British Columbia Ministry of Health. General Policy Direction - Integrated Health System for Primary and Community Care. Victoria BC; 2017.
29. Brcic V, McGregor MJ, Kaczorowski J, Dharamsi S, Verma S. Practice and payment preferences of newly practising family physicians in British Columbia. *Canadian Family Physician*. 2012;
30. West CP, Dyrbye LN, Satele D V., Sloan JA, Shanafelt TD. Concurrent Validity of Single-Item Measures of Emotional Exhaustion and Depersonalization in Burnout Assessment. *Journal of General Internal Medicine*. 2012 Nov 24;27(11):1445–52.
31. Dolan ED, Mohr D, Lempa M, Joos S, Fihn SD, Nelson KM, et al. Using a Single Item to Measure Burnout in Primary Care Staff: A Psychometric Evaluation. *Journal of General Internal Medicine*. 2015;
32. Kane CK. Updated Data on Physician Practice Arrangements: For the First Time, Fewer Physicians are Owners Than Employees [Internet]. American Medical Association; 2019 p. 16. (Policy Research Perspectives). Available from: <https://www.ama-assn.org/system/files/2019-07/prp-fewer-owners-benchmark-survey-2018.pdf>
33. Shanafelt TD, West CP, Sloan JA, Novotny PJ, Poland GA, Menaker R, et al. Career Fit and Burnout Among Academic Faculty. *Arch Intern Med*. 2009 May 25;169(10):990.
34. Cuellar A, Krist AH, Nichols LM, Kuzel AJ. Effect of Practice Ownership on Work Environment, Learning Culture, Psychological Safety, and Burnout. *Ann Fam Med*. 2018 Apr;16(Suppl 1):S44–51.
35. Dosanjh R. New GP Contracts Devalue Family Doctors. 2018.
36. College of Family Physicians of Canada, Canadian Medical Association, Royal College of Physicians and Surgeons of Canada. National Physician Survey: 2014 Response Rate [Internet]. National Physician Survey. 2014 [cited 2020 Jan 30]. Available from: <http://nationalphysiciansurvey.ca/surveys/2014-survey/response-rates/>

**Table 1: Study sample**

| Characteristic, N(%)            | New to Practice<br>Physicians<br>N=176 (33.5%) | Established<br>Physicians<br>N=349 (66.5%) | Total<br>N=525 | Test<br>Statistic       |
|---------------------------------|------------------------------------------------|--------------------------------------------|----------------|-------------------------|
| <i>Demographics</i>             |                                                |                                            |                |                         |
| Gender (women) <sup>1</sup>     | 109 (61.9)                                     | 182 (52.3)                                 | 291 (55.5)     | X <sup>2</sup> =4.4*    |
| International medical graduates | 85 (24.4)                                      | 27 (15.3)                                  | 112 (21.1)     | X <sup>2</sup> =5.7*    |
| Any rural practice              | 46 (26.1)                                      | 65 (18.6)                                  | 111 (21.1)     | X <sup>2</sup> =4.0*    |
| <i>Work Hours (SD)</i>          | 46.3 (15.0)                                    | 43.0 (15.2)                                | 44.1 (15.2)    | F=5.6*                  |
| <i>Practice model</i>           |                                                |                                            |                |                         |
| Full-time CBPC                  | 28 (15.9)                                      | 84 (24.1)                                  | 112 (21.3)     | X <sup>2</sup> =22.8*** |
| Mostly CBPC                     | 42 (23.9)                                      | 99 (28.4)                                  | 141 (26.9)     |                         |
| Mostly other work               | 40 (22.7)                                      | 62 (17.8)                                  | 102 (19.4)     |                         |
| Hospital/facility only          | 26 (14.8)                                      | 71 (20.3)                                  | 97 (18.5)      |                         |
| Locum only                      | 40 (22.7)                                      | 33 (9.5)                                   | 73 (13.9)      |                         |
| <i>Provides call coverage</i>   | 148 (84.1)                                     | 269 (77.1)                                 | 417 (79.4)     | X <sup>2</sup> =3.5     |
| <i>Weekly work hours</i>        |                                                |                                            |                |                         |
| <30                             | 12 (6.8)                                       | 57 (16.3)                                  | 69 (13.1)      | X <sup>2</sup> =12.1*   |
| 30-<40                          | 85 (16.2)                                      | 61 (17.5)                                  | 85 (16.2)      |                         |
| 40-<50                          | 157 (29.9)                                     | 98 (28.1)                                  | 157 (29.9)     |                         |
| 50-<60                          | 112 (21.3)                                     | 70 (20.1)                                  | 112 (21.3)     |                         |
| 60+                             | 102 (19.4)                                     | 63 (18.1)                                  | 102 (19.4)     |                         |

\*p&lt;0.05

\*\*p&lt;0.01

\*\*\*p&lt;0.001

<sup>1</sup>missing N=1

Weekly hours average 42.9 (SD 15.2) for established physicians and 46.3 (SD 15.0) for new grads, F=5.55, p=0.018

**Table 2:** Burnout frequency and priorities for reform

| Reform Priorities                                                         | New to Practice Physicians<br>N=172 (33.5%) | Established Physicians<br>N=341 (66.5%) | Total<br>N=513 <sup>1</sup> | Test Statistic   |
|---------------------------------------------------------------------------|---------------------------------------------|-----------------------------------------|-----------------------------|------------------|
| <i>High level of burnout<sup>1</sup></i>                                  | 91 (51.7)                                   | 132 (37.8)                              | 223 (42.5)                  | $X^2=9.2^{**}$   |
| <i>Reforms (Y/N)</i>                                                      |                                             |                                         |                             |                  |
| Primary care reform is needed                                             | 146 (84.9)                                  | 253 (74.1)                              | 399 (77.8)                  | $X^2=7.6^*$      |
| An APP model would make it easier to provide longitudinal care            | 117 (68.0)                                  | 136 (39.9)                              | 253 (49.4)                  | $X^2=39.5^{***}$ |
| I would prefer to be an employee of a clinic (not a small business owner) | 101 (58.7)                                  | 143 (41.9)                              | 244 (47.5)                  | $X^2=28.5^{***}$ |
| <i>Specific reform prioritie<sup>2</sup></i>                              |                                             |                                         |                             |                  |
| Payment Structure                                                         |                                             |                                         |                             |                  |
| Alternative forms of physician payment                                    | 109 (63.4)                                  | 136 (39.9)                              | 245 (47.8)                  | $X^2=25.3^{***}$ |
| Direct funding for team roles                                             | 133 (77.3)                                  | 209 (61.3)                              | 342 (66.7)                  | $X^2=13.2^{***}$ |
| Direct clinic funding                                                     | 124 (72.1)                                  | 183 (53.7)                              | 307 (59.8)                  | $X^2=16.2^{***}$ |
| Work Structure                                                            |                                             |                                         |                             |                  |
| Option to practice in a team                                              | 118 (68.6)                                  | 214 (62.7)                              | 332 (64.7)                  | $X^2=1.7$        |
| Time-limited commitment to patient panel                                  | 51 (29.7)                                   | 69 (20.2)                               | 120 (23.4)                  | $X^2=12.9^{***}$ |
| Transparent evaluation of transformation initiatives                      | 101 (58.7)                                  | 210 (61.6)                              | 311 (60.6)                  | $X^2=0.4$        |
| Option to work part-time                                                  | 144 (83.7)                                  | 213 (62.5)                              | 357 (69.6)                  | $X^2=24.4^{***}$ |
| Job Benefits                                                              |                                             |                                         |                             |                  |
| Vacation and parental leave                                               | 143 (83.1)                                  | 273 (80.1)                              | 416 (81.1)                  | $X^2=0.7$        |
| Loan forgiveness                                                          | 69 (40.1)                                   | 69 (20.2)                               | 138 (26.9)                  | $X^2=23.0^{***}$ |

<sup>1</sup>Defined as feeling burned out at a frequency of once per week or more.(31)

<sup>2</sup>Missing N=12 for all questions; proportion who reported each priority very important.

\*p<0.05

\*\*p<0.01

\*\*\*p<0.001

**Table 3:** Multivariable model results: burnout

|                                                        | High Rate of Burnout     |
|--------------------------------------------------------|--------------------------|
| <i>New grad (ref=established)</i>                      | 1.41 (0.92, 2.15)        |
| <i>Female (ref=male)</i>                               | <b>1.94 (1.32, 2.85)</b> |
| <i>Model of practice (ref = full-time CBPC)</i>        |                          |
| Mostly CBPC                                            | 1.55 (0.89, 2.68)        |
| Mostly other work                                      | 1.59 (0.87, 2.93)        |
| Hospital/facility only                                 | 0.93 (0.50, 1.73)        |
| Locum                                                  | 0.76 (0.37, 1.54)        |
| <i>Any Rural Practice (ref = Urban)</i>                | 1.31 (0.83, 2.08)        |
| <i>International training (ref = Canadian trained)</i> | 0.92 (0.58, 1.46)        |
| <i>Weekly work hours (ref=&lt;30)</i>                  |                          |
| 30-<40                                                 | 1.15 (0.55, 2.42)        |
| 40-<50                                                 | <b>2.60 (1.33, 5.08)</b> |
| 50-<60                                                 | <b>2.42 (1.19, 4.91)</b> |
| 60+                                                    | <b>4.26 (2.02, 8.98)</b> |

Confidential

1  
2  
3  
4  
5  
6  
7  
8  
9  
10  
11  
12  
13  
14  
15  
16  
17  
18  
19  
20  
21  
22  
23  
24  
25  
26  
27  
28  
29  
30  
31  
32  
33  
34  
35  
36  
37  
38  
39  
40  
41  
42  
43  
44  
45  
46  
47

**Table 4 (a and b):** Multivariable model results: reform priorities

|                                                        | Primary care reform is needed | An APP model would make it easier for me to provide longitudinal care | I would prefer to be an employee of a clinic (not a small business owner) | Payment Structure <sup>1</sup>         |                               |                          |
|--------------------------------------------------------|-------------------------------|-----------------------------------------------------------------------|---------------------------------------------------------------------------|----------------------------------------|-------------------------------|--------------------------|
|                                                        |                               |                                                                       |                                                                           | Alternative Forms of Physician Payment | Direct funding for team roles | Direct Clinic funding    |
| <i>New grad (ref= established)</i>                     | 1.56 (0.94, 2.59)             | <b>3.45 (2.22, 5.38)</b>                                              | <b>2.28 (1.48, 3.49)</b>                                                  | <b>2.89 (1.85, 4.52)</b>               | <b>2.40 (1.47, 3.90)</b>      | <b>2.27 (1.44, 3.58)</b> |
| <i>Female (ref=male)</i>                               | 0.88 (0.58, 1.35)             | 1.25 (0.86, 1.83)                                                     | 1.35 (0.93, 1.97)                                                         | 1.38 (0.94, 2.02)                      | 1.41 (0.95, 2.09)             | <b>1.47 (1.00, 2.14)</b> |
| <i>Model of practice (ref = full-time CBPC)</i>        |                               |                                                                       |                                                                           |                                        |                               |                          |
| Mostly CBPC                                            | 1.42 (0.75, 2.67)             | <b>1.95 (1.10, 3.42)</b>                                              | <b>2.01 (1.13, 3.56)</b>                                                  | <b>1.76 (1.00, 3.10)</b>               | <b>1.83 (1.03, 3.23)</b>      | 1.10 (0.63, 1.91)        |
| Mostly other work                                      | 1.11 (0.56, 2.20)             | <b>2.87 (1.54, 5.36)</b>                                              | <b>2.73 (1.46, 5.09)</b>                                                  | <b>3.51 (1.84, 6.69)</b>               | <b>2.67 (1.37, 5.21)</b>      | 1.17 (0.63, 2.18)        |
| Hospital/facility only                                 | 1.11 (0.56, 2.21)             | 1.34 (0.72, 2.51)                                                     | <b>2.12 (1.13, 3.99)</b>                                                  | <b>2.34 (1.25, 4.39)</b>               | <b>2.16 (1.14, 4.10)</b>      | 1.53 (0.82, 2.84)        |
| Locum                                                  | 1.38 (0.62, 3.10)             | 1.51 (0.75, 3.06)                                                     | 1.39 (0.69, 2.80)                                                         | 1.37 (0.67, 2.81)                      | 1.15 (0.56, 2.36)             | 0.66 (0.32, 1.32)        |
| <i>Any Rural Practice (ref = Urban)</i>                | <b>0.57 (0.35, 0.94)</b>      | 0.73 (0.46, 1.16)                                                     | 0.71 (0.45, 1.12)                                                         | 0.67 (0.42, 1.07)                      | 0.76 (0.47, 1.23)             | 1.13 (0.71, 1.81)        |
| <i>International training (ref = Canadian trained)</i> | 1.08 (0.64, 1.81)             | 0.88 (0.67, 1.40)                                                     | 0.63 (0.39, 1.00)                                                         | 0.99 (0.62, 1.57)                      | <b>1.69 (1.02, 2.79)</b>      | 1.15 (0.72, 1.82)        |
| <i>Weekly work hours (ref=&lt;30)</i>                  |                               |                                                                       |                                                                           |                                        |                               |                          |
| 30-<40                                                 | 1.41 (0.68, 2.91)             | 1.40 (0.72, 2.75)                                                     | 0.83 (0.42, 1.61)                                                         | 1.42 (0.71, 2.82)                      | 0.95 (0.46, 1.95)             | 1.22 (0.62, 2.41)        |
| 40-<50                                                 | 1.83 (0.93, 3.60)             | 1.39 (0.74, 2.59)                                                     | 0.73 (0.39, 1.35)                                                         | 1.80 (0.95, 3.40)                      | 0.94 (0.49, 1.81)             | 1.57 (0.84, 2.93)        |
| 50-<60                                                 | 1.67 (0.81, 3.44)             | 1.18 (0.61, 2.30)                                                     | 0.58 (0.30, 1.12)                                                         | 1.23 (0.63, 2.39)                      | 1.12 (0.56, 2.26)             | 1.31 (0.68, 2.52)        |
| 60+                                                    | 1.37 (0.64, 2.89)             | 1.00 (0.49, 2.03)                                                     | 0.64 (0.32, 1.29)                                                         | 1.01 (0.49, 2.09)                      | 1.44 (0.68, 3.07)             | 1.65 (0.81, 3.34)        |

<sup>1</sup>Odds of reporting each reform priority as very important.

|                                                        | Work Structure <sup>1</sup>  |                                          |                                                      | Job Benefits <sup>1</sup> |                             |                          |
|--------------------------------------------------------|------------------------------|------------------------------------------|------------------------------------------------------|---------------------------|-----------------------------|--------------------------|
|                                                        | Option to practice in a team | Time-limited commitment to patient panel | Transparent evaluation of transformation initiatives | Option to work part-time  | Vacation and parental leave | Loan forgiveness         |
| <i>New grad (ref= established)</i>                     | <b>4.29 (2.45, 7.52)</b>     | <b>1.81 (1.13, 2.91)</b>                 | 0.93 (0.61, 1.43)                                    | <b>1.37 (0.87, 2.17)</b>  | 1.34 (0.77, 2.33)           | <b>2.15 (1.37, 3.36)</b> |
| <i>Female (ref=male)</i>                               | 1.14 (0.75, 1.71)            | 1.21 (0.78, 1.88)                        | 1.17 (0.81, 1.71)                                    | 1.27 (0.85, 1.88)         | 1.37 (0.86, 2.18)           | 1.24 (0.82, 1.90)        |
| <i>Model of practice (ref = full-time CBPC)</i>        |                              |                                          |                                                      |                           |                             |                          |
| Mostly CBPC                                            | <b>1.98 (1.10, 3.56)</b>     | 1.27 (0.65, 2.51)                        | 1.49 (0.86, 2.58)                                    | <b>1.88 (1.07, 3.31)</b>  | 0.98 (0.50, 1.92)           | 1.30 (0.70, 2.42)        |
| Mostly other work                                      | <b>2.61 (1.31, 5.19)</b>     | <b>2.41 (1.17, 4.98)</b>                 | <b>2.20 (1.16, 4.17)</b>                             | 1.43 (0.76, 2.70)         | 0.95 (0.44, 2.04)           | 1.68 (0.84, 3.35)        |
| Hospital/facility only                                 | <b>2.34 (1.20, 4.54)</b>     | <b>2.14 (1.03, 4.44)</b>                 | 1.28 (0.70, 2.35)                                    | 1.20 (0.64, 2.22)         | 0.57 (0.28, 1.17)           | 1.52 (0.76, 3.03)        |
| Locum                                                  | 1.16 (0.55, 2.48)            | <b>2.35 (1.05, 5.24)</b>                 | 1.07 (0.54, 2.13)                                    | 1.77 (0.85, 3.72)         | 1.20 (0.48, 3.03)           | 1.49 (0.69, 3.21)        |
| <i>Any Rural Practice (ref = Urban)</i>                | 0.64 (0.39, 1.06)            | 0.67 (0.39, 1.17)                        | 0.68 (0.43, 1.07)                                    | 1.16 (0.71, 1.91)         | 1.21 (0.66, 2.21)           | 0.87 (0.52, 1.45)        |
| <i>International training (ref = Canadian trained)</i> | <b>1.68 (1.01, 2.82)</b>     | <b>2.48 (1.48, 4.14)</b>                 | 0.90 (0.57, 1.42)                                    | 0.83 (0.51, 1.34)         | 0.97 (0.55, 1.71)           | 1.59 (0.97, 2.63)        |
| <i>Weekly work hours (ref=&lt;30)</i>                  |                              |                                          |                                                      |                           |                             |                          |
| 30-<40                                                 | 0.71 (0.34, 1.51)            | 0.85 (0.37, 1.96)                        | 0.90 (0.45, 1.79)                                    | 0.99 (0.44, 2.22)         | 0.91 (0.36, 2.28)           | 1.50 (0.65, 3.46)        |
| 40-<50                                                 | 0.93 (0.46, 1.86)            | 1.26 (0.60, 2.65)                        | 0.77 (0.41, 1.44)                                    | 0.61 (0.30, 1.26)         | 0.65 (0.28, 1.48)           | 1.68 (0.77, 3.65)        |
| 50-<60                                                 | 0.82 (0.39, 1.70)            | 1.07 (0.48, 2.36)                        | 1.22 (0.62, 2.40)                                    | <b>0.29 (0.14, 0.60)</b>  | 0.71 (0.30, 1.68)           | 1.74 (0.77, 3.92)        |
| 60+                                                    | 0.80 (0.37, 1.74)            | 2.13 (0.94, 4.79)                        | 1.30 (0.63, 2.67)                                    | <b>0.32 (0.15, 0.69)</b>  | 0.53 (0.22, 1.31)           | <b>3.44 (1.49, 7.91)</b> |

<sup>1</sup>Odds of reporting each reform priority as very important.
